# Supplementary material for: A cascade surface immobilization strategy to access high-density and closely distanced atomic Pt sites for enhancing alkaline hydrogen evolution reaction
Source: Royal Society of Chemistry journal article supplement (doi:10.1039/d0ta00495b), 2020-01-01
Supplement: d0ta00495b1.pdf [file d0ta00495b1.pdf]

## Electronic Supplementary Information

### **Cascade Surface Immobilization Strategy to Access High-density and Closely-distanced Atomic Pt Sites for Enhancing Alkaline Hydrogen Evolution Reaction**

**Wenping Liu,<sup>a</sup> Jing Ji,<sup>c</sup> Xuecheng Yan,<sup>b</sup> Wenbo Liu,<sup>a</sup> Yu-Cheng Huang,<sup>d</sup> Kang  
Wang,<sup>\*a</sup> Peng Jin,<sup>\*c</sup> Xiangdong Yao<sup>b</sup> and Jianzhuang Jiang<sup>\*a</sup>**

*<sup>a</sup> Beijing Key Laboratory for Science and Application of Functional Molecular and Crystalline Materials, Department of Chemistry, University of Science and Technology Beijing, Beijing 100083, China*

*<sup>b</sup> Queensland Micro- and Nanotechnology Centre, Griffith University, Nathan Campus QLD 4111, Australia*

*<sup>c</sup> School of Materials Science and Engineering, Hebei University of Technology, Tianjin 300130, PR China*

*<sup>d</sup> Department of Physics, Tamkang University, 151 Yingzhuan Road, New Taipei City, 25137*

E-mail: kangwang@ustb.edu.cn (K.W.), china.peng.jin@gmail.com (P.J.),  
jianzhuang@ustb.edu.cn (J.J.)

## Experimental Section

**General Remarks.** All chemicals were used as purchased without further purification unless otherwise specified. H<sub>2</sub>TBPP, PtTBPP, RhTBPP, and PdTBPP were prepared according to published procedures.<sup>S1</sup>

**Synthesis of PtSA@BP.** Carbon black (BP 2000) powder (40 mg) was added into the THF solution of PtTBPP (25 ml, 0.3 mg mL<sup>-1</sup>). The suspension was stirred for 12 h and the black product was collected by filtration, washed with ethanol and DI water, and dried under reduced pressure, affording the PtTBPP/BP hybrid (*ca.* 42 mg). The PtTBPP/BP hybrid was subsequently heated at 280°C for 1 h and then at 800 °C for another 2 h with a heating rate of 5°C min<sup>-1</sup>, resulting in a product PtSA@BP (*ca.* 35 mg). ICP-AES analysis reveals a loading of 2.5 wt% for Pt in the as-prepared sample.

Following the above-described procedure with the THF solution of PtTBPP (25 ml, 0.05, 0.10, and 0.20 mg mL<sup>-1</sup>) instead of PtTBPP (25 ml, 0.3 mg mL<sup>-1</sup>), a series of PtSA@BP samples with the Pt loading of 0.4, 0.7, and 2.0 wt%, respectively, were prepared.

**Synthesis of NBP.** Also by means of the above-mentioned synthesis procedure for PtSA@BP with metal free H<sub>2</sub>TBPP (25 ml, 0.3 mg mL<sup>-1</sup>) instead of PtTBPP (25 ml, 0.3 mg mL<sup>-1</sup>), the metal free nitrogen-doped sample NBP (*ca.* 32 mg) was synthesized.

**Synthesis of RhSA@BP.** Also by means of the above-mentioned synthesis procedure for

PtSA@BP with RhTBPP (25 ml, 0.3 mg mL<sup>-1</sup>) instead of PtTBPP (25 ml, 0.3 mg mL<sup>-1</sup>), RhSA@BP (*ca.* 33 mg) was synthesized.

**Synthesis of PdSA@BP.** Also by means of the above-mentioned synthesis procedure for PtSA@BP with PdTBPP (25 ml, 0.3 mg mL<sup>-1</sup>) instead of PtTBPP (25 ml, 0.3 mg mL<sup>-1</sup>), PdSA@BP (*ca.* 32 mg) was synthesized.

**Scaled-up synthesis of PtSA@BP.** By means of the synthesis procedure for PtSA@BP as mentioned above with increasing the dosage of all the reagents by 75 times, *ca.* 3000 mg PtSA@BP was obtained by one synthesis process.

**Characterizations.** HT7700 electron microscope at 100 KV was utilized for transmission electron microscopy (TEM) measurement. HAADF-STEM images and energy dispersive spectroscopy (EDS) mapping images were taken on a JEM-ARM200F electron microscope operated at 200 kV. AC STEM images were collected from TECNAI 12 and probe-corrected JEOL ARM200F with an acceleration voltage of 200 kV. Solid-state UV-Vis diffuse reflectance spectra were recorded on an SHIMADZU UV-2600 spectrophotometer. Solution-state UV-Vis absorption spectra were collected using a Perkin-Elmer Lambda 750 UV-vis spectrophotometer. Fluorescence analyses were carried out on a HITACHI F-4500 spectrometer. X-ray photoelectron spectra (XPS) were collected from PHI 5300 ESCA System (PerkinElmer, USA). N<sub>2</sub> adsorption-desorption isotherms were measured on a ASAP 2020 PLUS HD88 apparatus at 77 K and the surface areas were calculated by the Brunauer Emmette Teller (BET) method. TG-DSC

(NETZSCH STA 409 PC/PG) was applied to trace the weight loss in the carbonization stage. Raman spectra were recorded on a Renishaw InVia spectrometer with a model 100 Ramascope optical fiber instrument. ICP-AES was performed on a Thermo IRIS Intrepid II XSP spectrometer. Before measurement, the samples were degassed in a vacuum at 120°C for 12 hours. XRD patterns were acquired at room temperature with a Shimadzu XRD-6000 diffractometer.

**EXAFS measurement and data analysis.** X-ray absorption spectra (XAS) were obtained at the National Synchrotron Radiation Research Center (NSRRC), Hsinchu, Taiwan, and the hard X-ray absorption data for the Pt L3-edge were collected at beamline BL17C. The acquired EXAFS raw data were then background-subtracted, normalized, and Fourier-transformed by using the ATHENA program in the IFEFFIT software package. Least-squares curve parameter fitting was performed using the ARTEMIS module of IFEFFIT software packages.

**Electrochemical Measurements.** All electrochemical tests were conducted on the CHI 760E workstation (CH Instruments, Inc.) with a RRDE-3A rotator (ALS Co., Ltd). A typical three-electrode system was employed, using a commercial glassy carbon (GC) electrode (3 mm diameter, 0.07065 cm<sup>2</sup>) as the working electrode, a carbon rod and Ag/AgCl electrode (in saturated KCl solution) as the counter and reference electrodes, respectively. All potentials were referred to the reversible hydrogen electrode by adding a value of (0.197 + 0.059×pH) V. LSV with a scan rate of 10 mVs<sup>-1</sup> was carried out from 0.2 to -0.7 V versus RHE in electrolyte solution under continuous purging with N<sub>2</sub>. All

the electrochemical tests in this study were conducted at least three times to ensure the accuracy of the measurements.

**Preparation of the working electrode.** For the PtSA@BP electrode, different loading amounts of PtSA@BP on the GC electrodes were employed to record the LSV curves to optimize the test conditions. Typically, 1 mg of PtSA@BP and 50  $\mu\text{L}$  of 5 wt % Nafion solution were dispersed in 950 mL of 4:1 v/v water/ethanol by sonication for 1 h to form a homogeneous solution. Then, 2.5  $\mu\text{L}$  of the solution was loaded onto the GC electrode. The final loading of PtSA@BP on the GC electrodes was about 0.036  $\text{mg cm}^{-2}$  with the Pt loading of 0.0009  $\text{mg}_{\text{Pt}} \text{cm}^{-2}$ . By means of the above preparation procedure with 0.25, 0.5, 0.75, 2, and 3 mg of PtSA@BP instead of 1 mg of PtSA@BP, the working electrodes with PtSA@BP loading amounts of 0.009, 0.018, 0.027, 0.072, and 0.108  $\text{mg cm}^{-2}$  (correspond to the Pt loading of 0.00023, 0.00045, 0.00068, 0.0018, and 0.0027  $\text{mg}_{\text{Pt}} \text{cm}^{-2}$ ) were also prepared. The LSV curves recorded on these PtSA@BP electrodes are shown in Figure S13. As can be seen, the overpotentials at a current density of 10  $\text{mA cm}^{-2}$  decrease with the increase of the loading amount of Pt species in the range of 0.00023 to 0.0009  $\text{mg}_{\text{Pt}} \text{cm}^{-2}$  and remain unchanged above 0.0009  $\text{mg}_{\text{Pt}} \text{cm}^{-2}$ . As a result, the PtSA@BP electrode with the Pt loading amount of 0.0009  $\text{mg}_{\text{Pt}} \text{cm}^{-2}$  (correspond to 0.036  $\text{mg cm}^{-2}$  PtSA@BP loaded onto the GC electrode) was used to further investigate the HER activity of PtSA@BP. In addition, the working electrodes of PtSA@BP 0.4%, PtSA@BP 0.7%, and PtSA@BP 2.0% in the present work were also prepared by means of the above preparation procedure with 1 mg of PtSA@BP 0.4%, PtSA@BP 0.7%, and PtSA@BP 2.0% instead of 1 mg of PtSA@BP, respectively. It is worth noting that the

optimized loading amount of commercial Pt/C (20 wt%) on the GC electrode was also determined, which is ca. 0.229 mg cm<sup>-2</sup> (correspond to the Pt loading of ca. 0.045 mg<sub>Pt</sub> cm<sup>-2</sup>). As for the working electrodes of original BP and NBP, 4 mg of sample and 50 μL of 5 wt % Nafion solution were dispersed in 950 mL of 4:1 v/v water/ethanol by sonication for 1 h to form a homogeneous solution. Then, 4 μL of the solution was loaded onto the GC electrode.

**Determination of mass activity and turnover frequency (TOF).** The mass activity and TOF can be calculated by the following equations.

$$\text{mass activity} = \frac{I}{m}$$

$$\text{TOF} = \frac{I}{2Fn}$$

Here,  $I$  is the current during the linear sweep measurement (in A);  $m$  is the catalyst loading;  $F$  is the Faraday constant (in C mol<sup>-1</sup>);  $n$  is the number of active sites (in mol). The factor 1/2 suggests that the formation of one hydrogen molecule needs two electrons.

**Computational Methods.** All spin-polarized first-principles calculations were performed by using the Perdew-Burke-Ernzerhof (PBE)<sup>S2</sup> exchange–correlation functional as implemented in the Vienna *ab initio* simulation package (VASP).<sup>S3,S4</sup> The projector augmented wave (PAW) pseudopotential was used and a cutoff energy of 500 eV was set for the plane wave basis set. DFT-D3 method was employed to describe the weak interactions in the systems.<sup>S5</sup> To avoid the interactions between slabs and their periodic images, a vacuum space of 15 Å was applied along the z-direction in the supercells. The

k-points of  $2 \times 2 \times 1$  were generated using the Monkhorst-Pack method. The convergence thresholds for the energy and force are  $10^{-5}$  eV and  $0.02$  eV/Å, respectively.

To determine the stable adsorption site for the Pt atoms on graphene, the binding energy ( $E_b$ ) for each site was calculated by the following equation:

$$E_b = (E_{n\text{Pt}/\text{NG}} - E_{\text{NG}} - nE_{\text{Pt}})/n$$

where  $E_{n\text{Pt}/\text{NG}}$ ,  $E_{\text{NG}}$  and  $E_{\text{Pt}}$  represent the total energies of the Pt atoms embedded N-doped graphene, the N-doped graphene, and the isolated Pt atom, respectively. Accordingly, a more negative  $E_b$  value indicates that the adsorption of the Pt atoms on the N-doped graphene is thermodynamically more favorable.

The hydrogen adsorption Gibbs free energy is defined as:

$$\Delta G_{\text{H}^*} = \Delta E + \Delta ZPE - T\Delta S$$

where  $\Delta E$  is the difference in electronic energies and defined as:

$$\Delta E = E_{\text{H}/\text{surf}} - E_{\text{surf}} - E_{\text{H}_2}/2$$

where  $E_{\text{H}/\text{surf}}$  and  $E_{\text{surf}}$  are the total energies of catalyst surface with and without the hydrogen atom, respectively, and  $E_{\text{H}_2}$  means the energy of  $\text{H}_2$  in gas phase.  $\Delta ZPE$  and  $\Delta S$  are the changes in zero-point energy and entropy between the adsorbed and gas phase of hydrogen, respectively. In practice, the free energy can be approximately calculated as  $\Delta G_{\text{H}^*} = \Delta E + 0.24$ .<sup>S6</sup>

The adsorption energy of  $\text{H}_2\text{O}$  on catalyst surface was calculated as:

$$E_{\text{ads}} = E_{\text{H}_2\text{O}/\text{surf}} - E_{\text{surf}} - E_{\text{H}_2\text{O}}$$

where  $E_{\text{H}_2\text{O}/\text{surf}}$ ,  $E_{\text{surf}}$  and  $E_{\text{H}_2\text{O}}$  are the total energies of the catalyst surface with and without adsorbed  $\text{H}_2\text{O}$  and an isolated  $\text{H}_2\text{O}$  molecule, respectively.

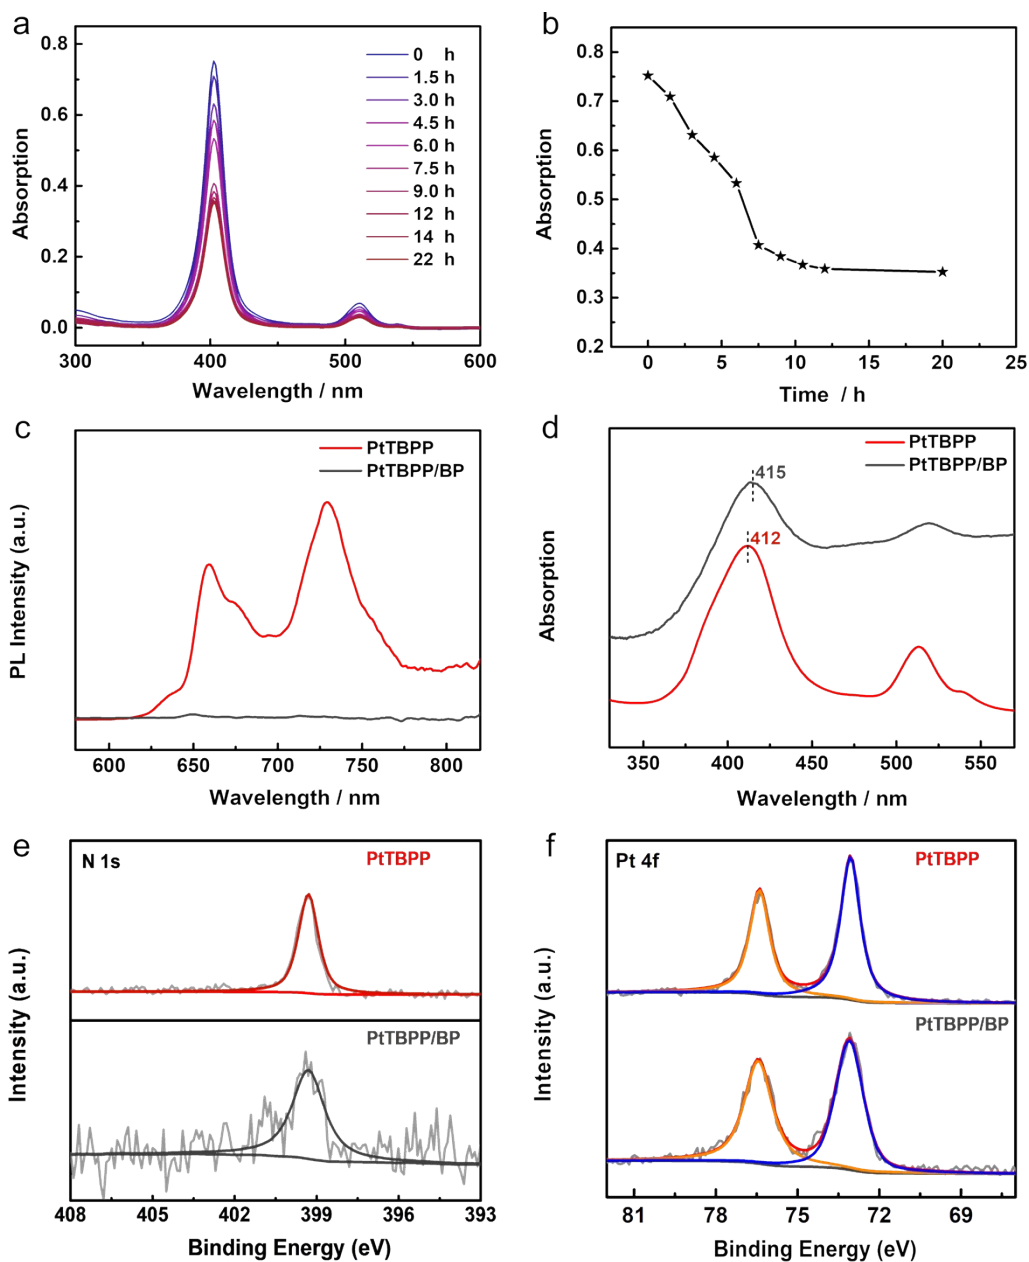

**Fig. S1** (a) UV-vis absorption spectra of PtTBPP in THF at different times and (b) plot of absorption of PtTBPP in THF at 401 nm as a function of time during the preparation of PtTBPP/BP. (c) Solid-state fluorescence spectra PtTBPP and PtTBPP/BP. (d) Solid-state UV-vis diffuse reflectance spectra of PtTBPP and PtTBPP/BP. XPS high resolution (e) N 1s and (f) Pt 4f spectra of PtTBPP and PtTBPP/BP.



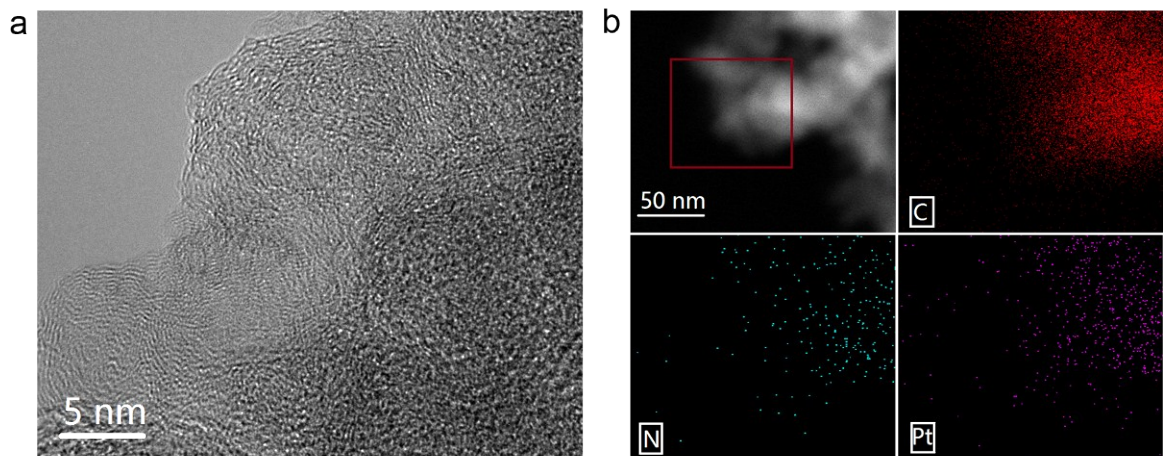

**Fig. S2** (a) HRTEM image and STEM-EDS element mapping of PtTBPP/BP.

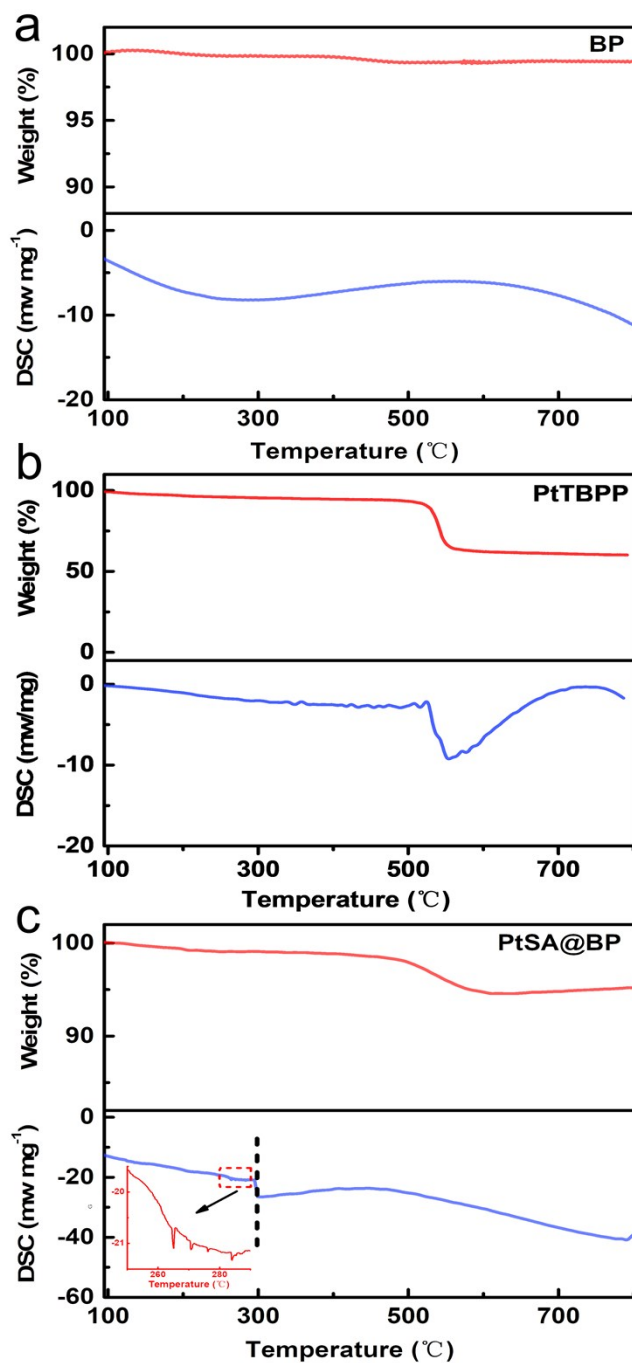

**Fig. S3** TG and DSC of (a) PtTBPP, (b) BP, and (c) PtTBPP/BP (the left side of the dashed line is tested in the differential thermal instrument).

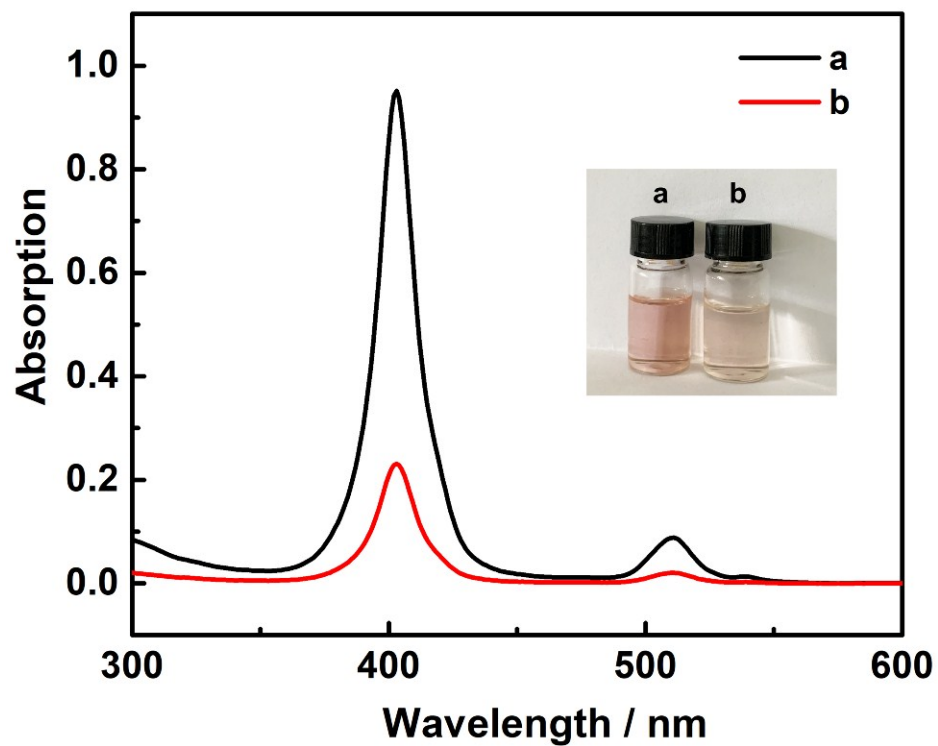

**Fig. S4** UV-vis absorption spectra and images of immersing the (a) original PtTBPP/BP hybrid and (b) PtTBPP/BP hybrid after heating at 280°C for 1 h into THF.

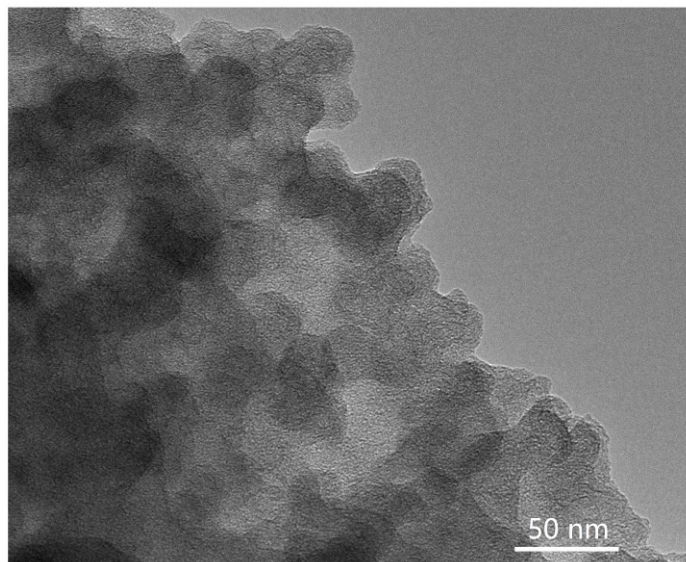

**Fig. S5** The TEM image of BP.

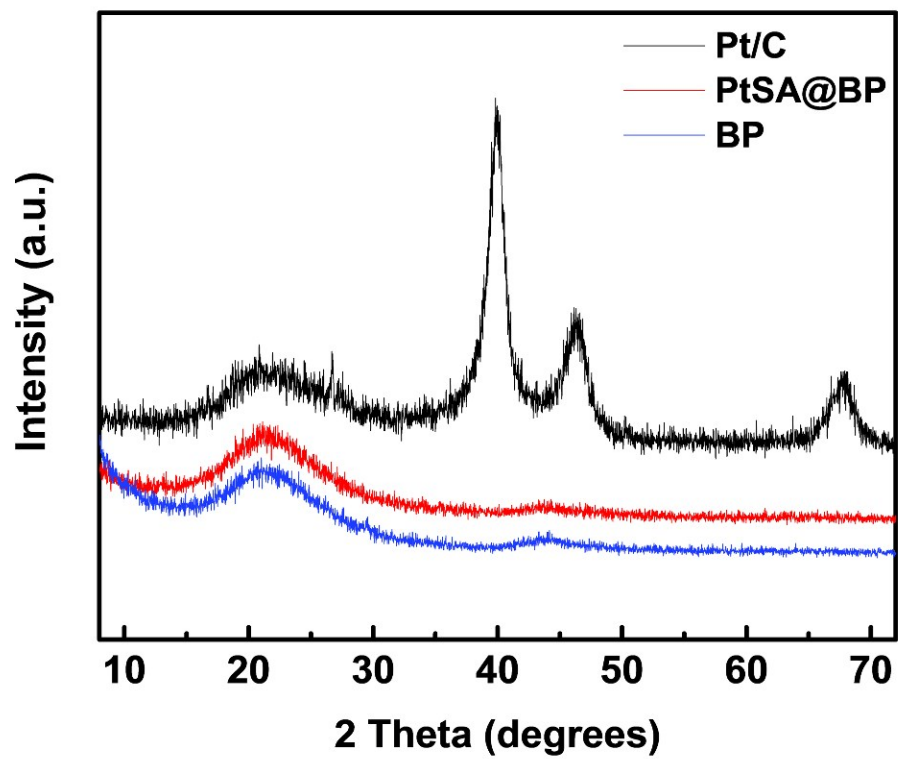

**Fig. S6** PXRD patterns of Pt/C, PtSA@BP, and BP.

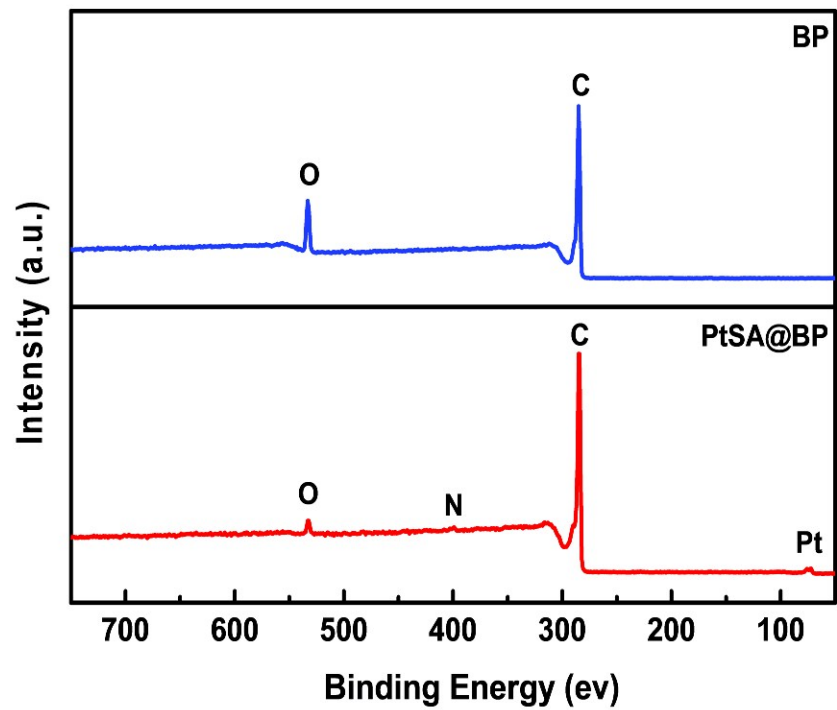

**Fig. S7** XPS overall spectra of BP and PtSA@BP.

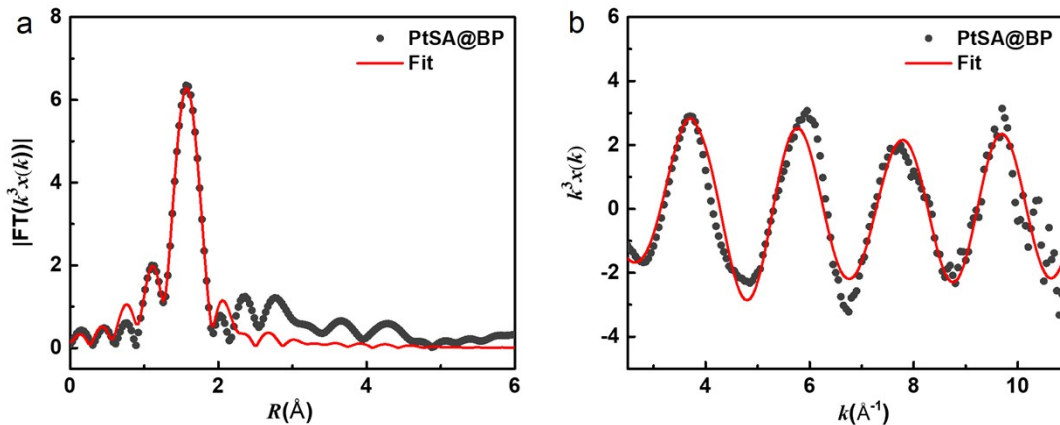

**Fig. S8** EXAFS fitting curves of the PtSA@BP in (a) R- and (b) k-space. In the EXAFS fitting, the amplitude reduction factor  $S_0^2$  (0.80) was fixed, while the number of neighbors  $N$ , internal atomic distances  $R$ , Debye-Waller factor  $\sigma^2$ , and the edge-energy shift  $\Delta E_0$  were allowed to run freely. Two scattering paths (Pt-N and Pt-C) were applied. (the obtained coordination number of Pt-N and Pt-C was 1.1 and 2.4, respectively).

Fitting results of Pt L3-edge EXAFS curves.

| Sample           | Scattering pair | N    | R(Å) | $\sigma^2(10^{-3} \text{Å}^2)$ | $\Delta E_0(\text{eV})$ | R factor |
|------------------|-----------------|------|------|--------------------------------|-------------------------|----------|
| Pt foil          | Pt-Pt           | 12.0 | 2.77 |                                |                         |          |
| PtO <sub>2</sub> | Pt-O            | 6.0  | 2.07 |                                |                         |          |
| PtSA@BP          | Pt-C            | 2.4  | 1.97 | 0.1                            | 12.57                   | 0.0016   |
|                  | Pt-N            | 1.1  | 2.12 | 0.1                            | 12.57                   |          |

$N$  is the coordination number;  $R$  is interatomic distance (the bond length between central atoms and surrounding coordination atoms);  $\sigma^2$  is Debye-Waller factor (a measure of thermal and static disorder in absorber-scatterer distances);  $\Delta E_0$  is edge-energy shift.  $R$  factor is used to value the goodness of the fitting.

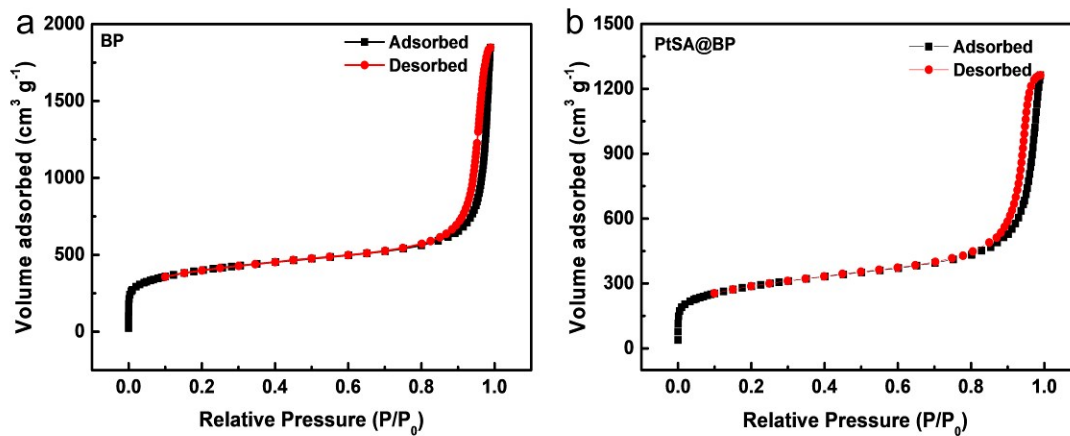

**Fig. S9**  $N_2$  sorption isotherms of (a) BP and (b) PtSA@BP at 77K.



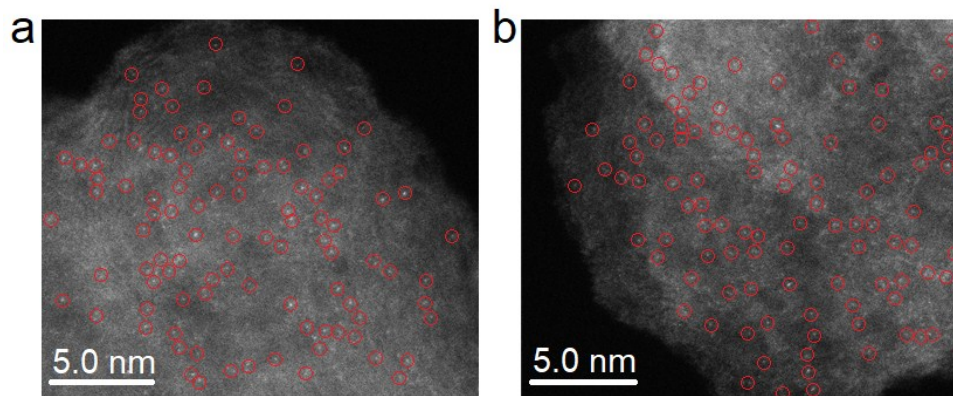

**Fig. S10** The aberration-corrected HAADF-STEM images of (a) PdSA@BP and (b) RhSA@BP.

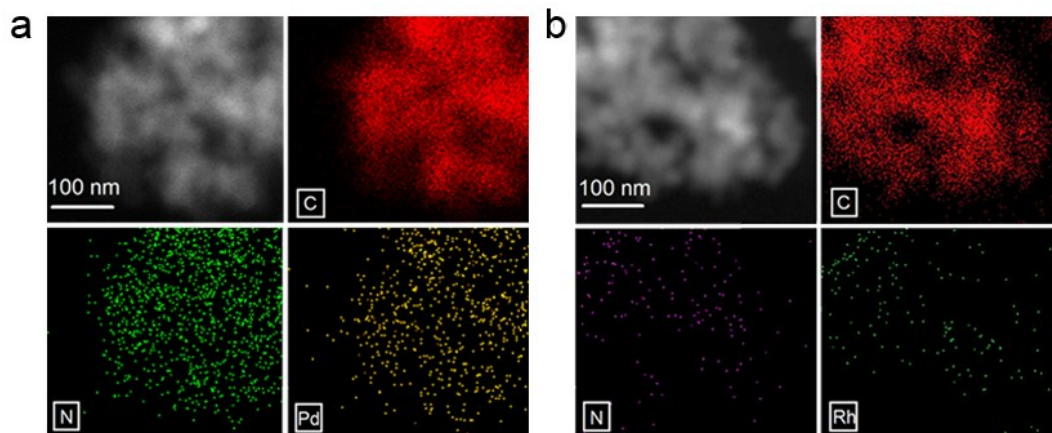

**Fig. S11** The HAADF-STEM and EDS element mapping images (a) of PdSA@BP and (b) RhSA@BP.

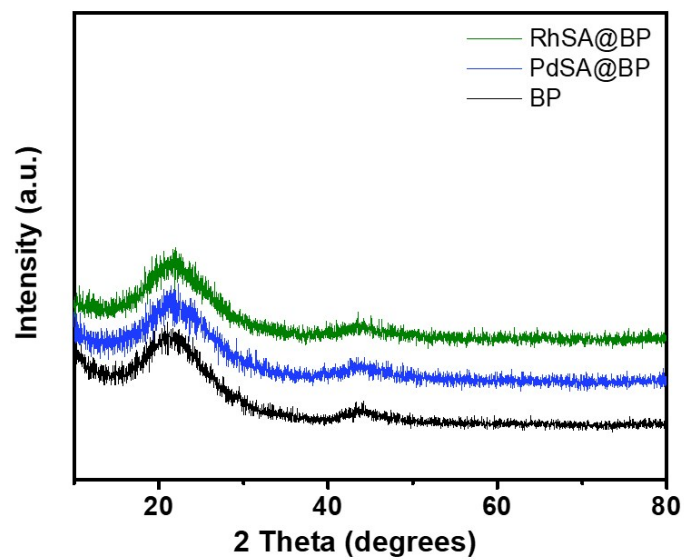

**Fig. S12.** PXRD patterns of RhSA@BP, PdSA@BP, and BP.

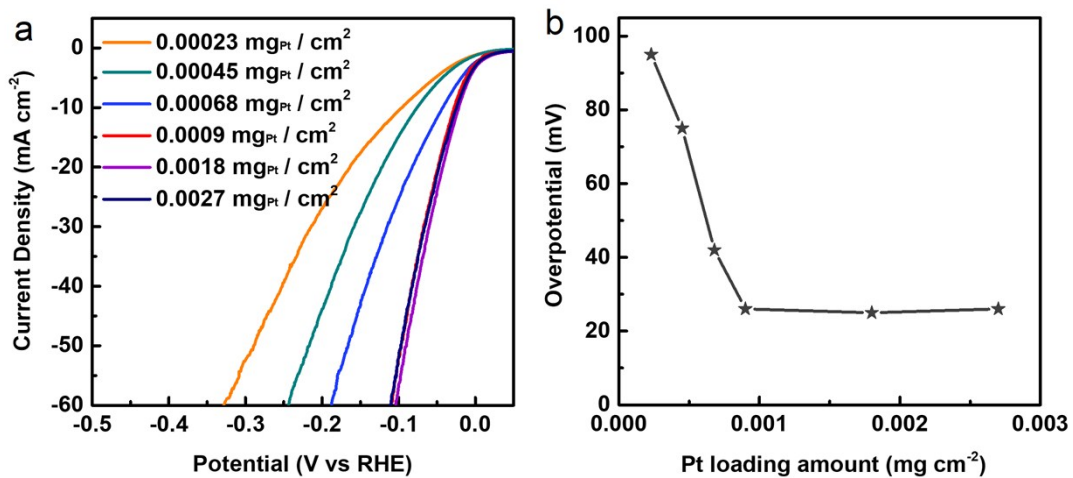

**Fig. S13** (a) LSV curves on the PtSA@BP electrodes with the different loading amounts of Pt species in 1.0 M KOH at a scan rate of 5 mV s<sup>-1</sup>. (b) The overpotential at a current density of 10 mA cm<sup>-2</sup> on PtSA@BP electrodes with the different loading amounts of Pt species.

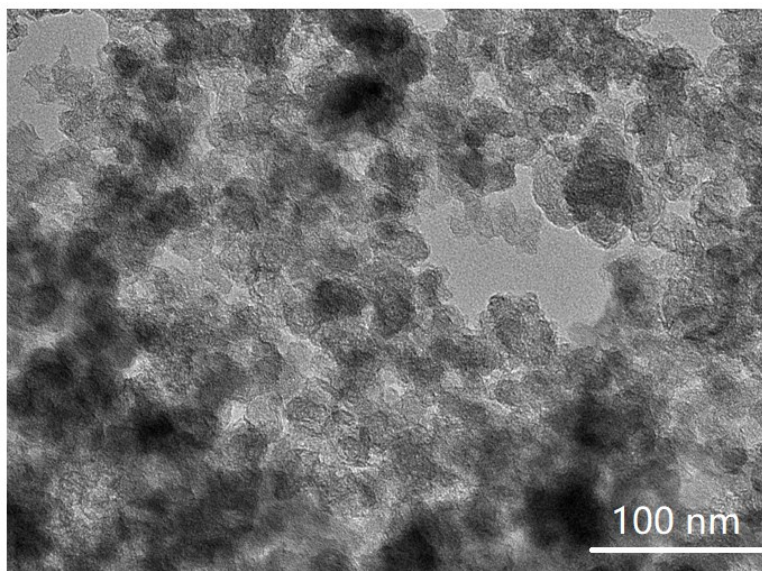

**Fig. S14.** TEM image of PtSA@BP after i-t test.

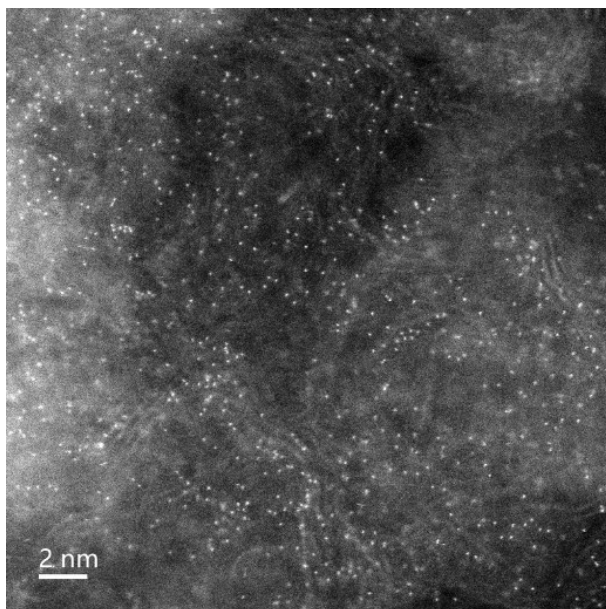

**Fig. S15.** The aberration-corrected HAADF-STEM image of PtSA@BP after i-t test.

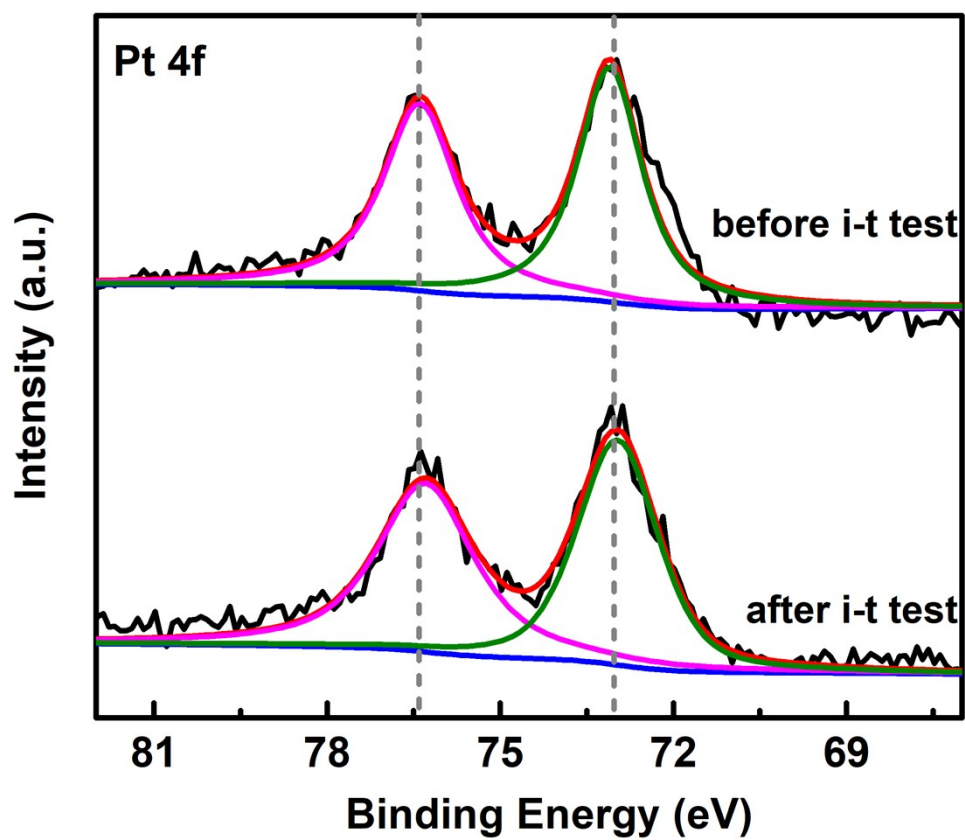

**Fig. S16** XPS high resolution Pt 4f spectra of PtSA@BP before and after i-t test.

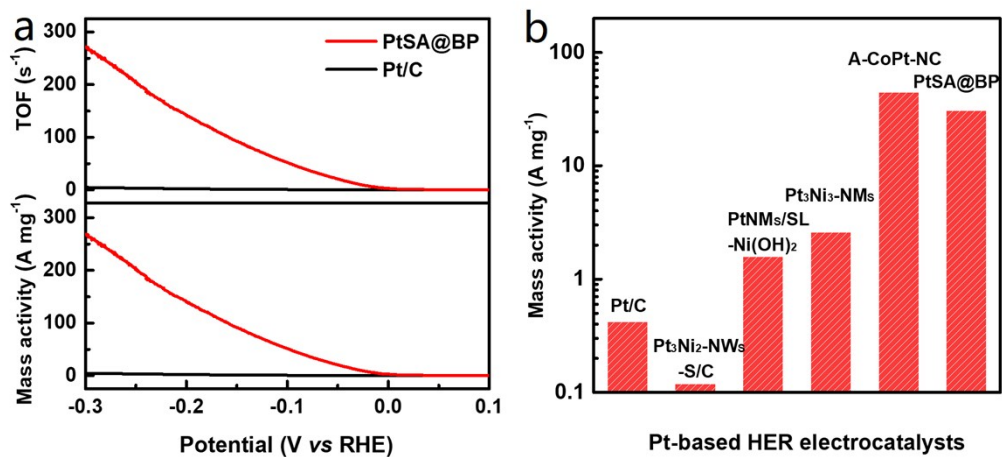

**Fig. S17** (a) TOFs (top) and mass activities (bottom) of PtSA@BP and Pt/C at varied overpotentials in 1.0 M KOH. (b) Mass activity of various Pt-based HER electrocatalysts at an overpotential of 70 mV in alkaline media.



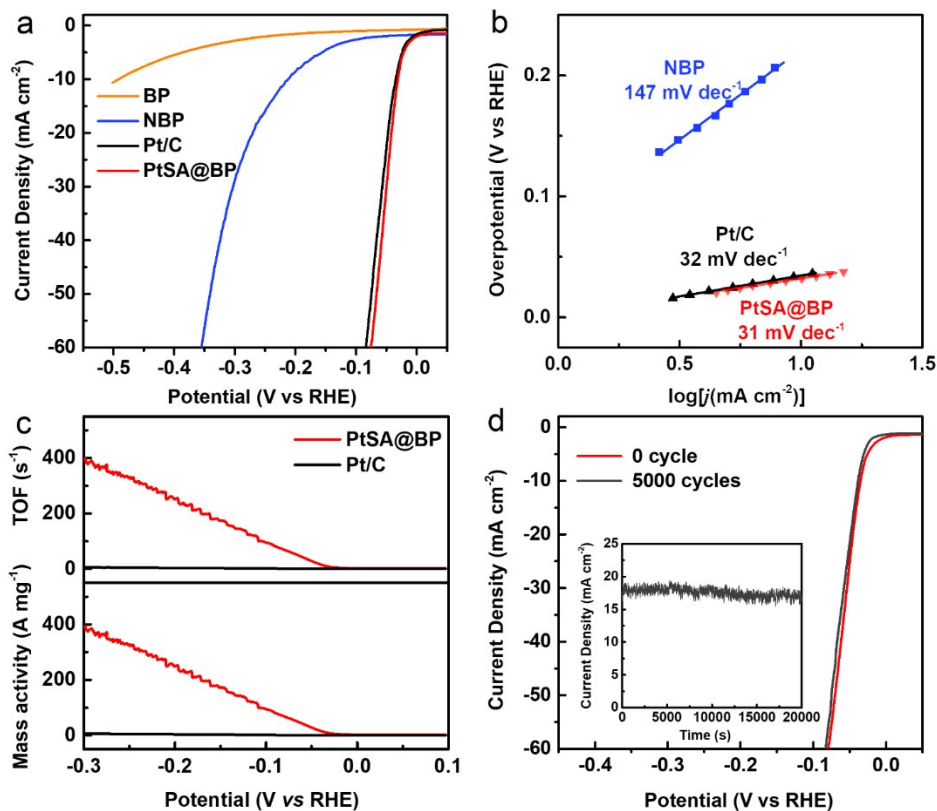

**Fig. S18** (a) LSV curves of BP, NBP, PtSA@BP, and Pt/C in 0.5 M H<sub>2</sub>SO<sub>4</sub> at a scan rate of 5 mV s<sup>-1</sup>. (b) Tafel plots of NBP, PtSA@BP, and Pt/C in 0.5 M H<sub>2</sub>SO<sub>4</sub>. (c) TOFs (top) and mass activities (bottom) of PtSA@BP and Pt/C at varied overpotentials in 0.5 M H<sub>2</sub>SO<sub>4</sub>. (d) Polarization curves of PtSA@BP recorded initially and after 5000 cyclic voltammetry scans at a scan rate of 50 mV s<sup>-1</sup>. Inset shows the chronoamperometric responses recorded on PtSA@BP for 20000s.

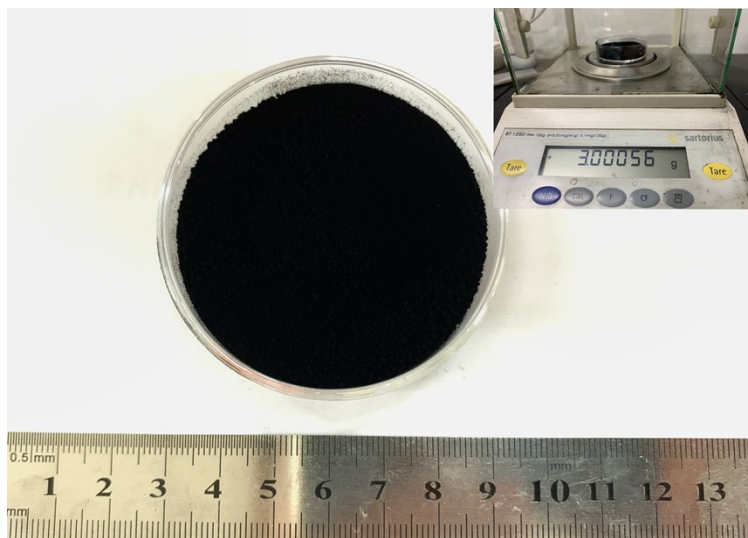

**Fig. S19** Picture of ~3000 mg of the PtSA@BP catalyst.

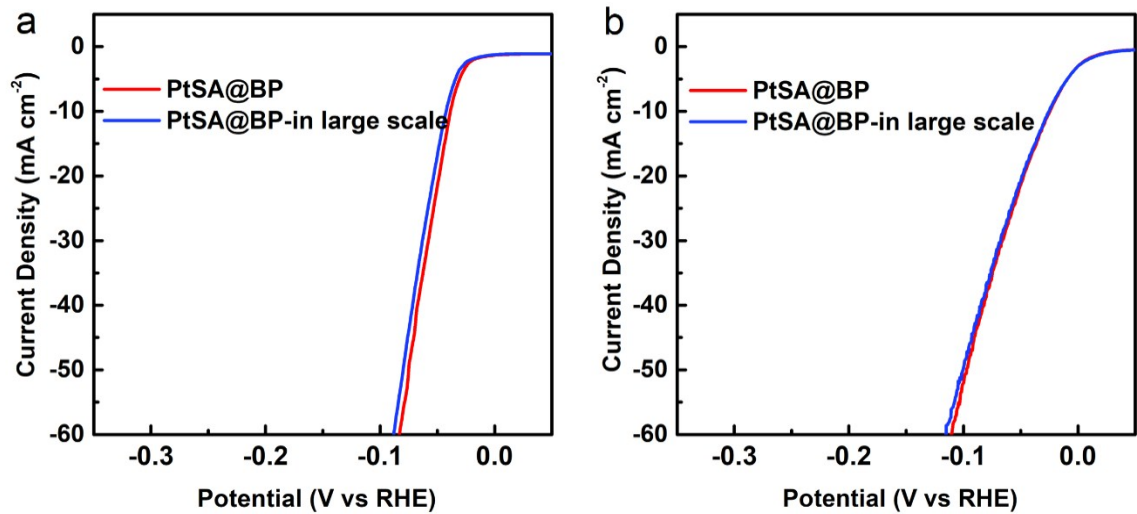

**Fig. S20** LSV curves of PtSA@BP and PtSA@BP-in large scale in (a) 0.5 M H<sub>2</sub>SO<sub>4</sub> and (b) 1.0 M KOH.

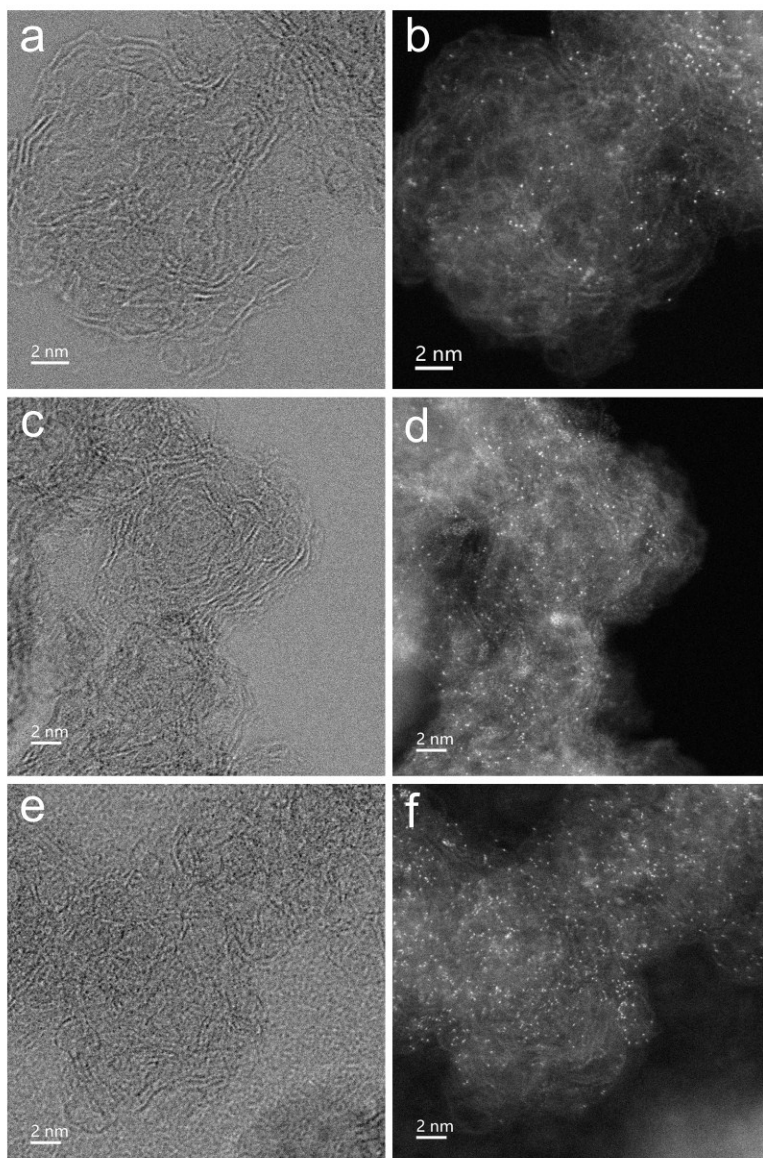

**Fig. S21** The HRTEM images and aberration-corrected HAADF-STEM images of (a)(b) PtSA@BP 0.4%, (c)(d) PtSA@BP 0.7%, and (e)(f) PtSA@BP 2.0%.

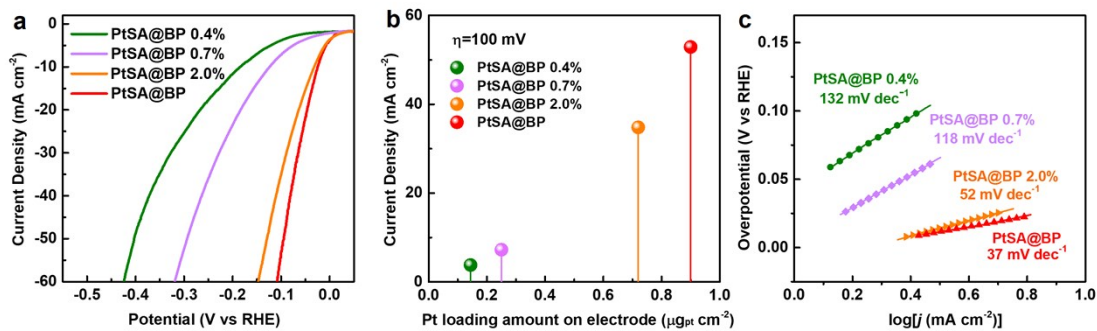

**Fig. S22** (a) LSV curves of PtSA@BP 0.4%, PtSA@BP 0.7%, PtSA@BP 2.0%, and PtSA@BP in 1.0 M KOH at a scan rate of  $5 \text{ mV s}^{-1}$ . (b) Comparison of the current densities of PtSA@BP 0.4%, PtSA@BP 0.7%, PtSA@BP 2.0%, and PtSA@BP at an overpotential of 100 mV in 1.0 M KOH. (c) Tafel plots of PtSA@BP 0.4%, PtSA@BP 0.7%, PtSA@BP 2.0%, and PtSA@BP in 1.0 M KOH.

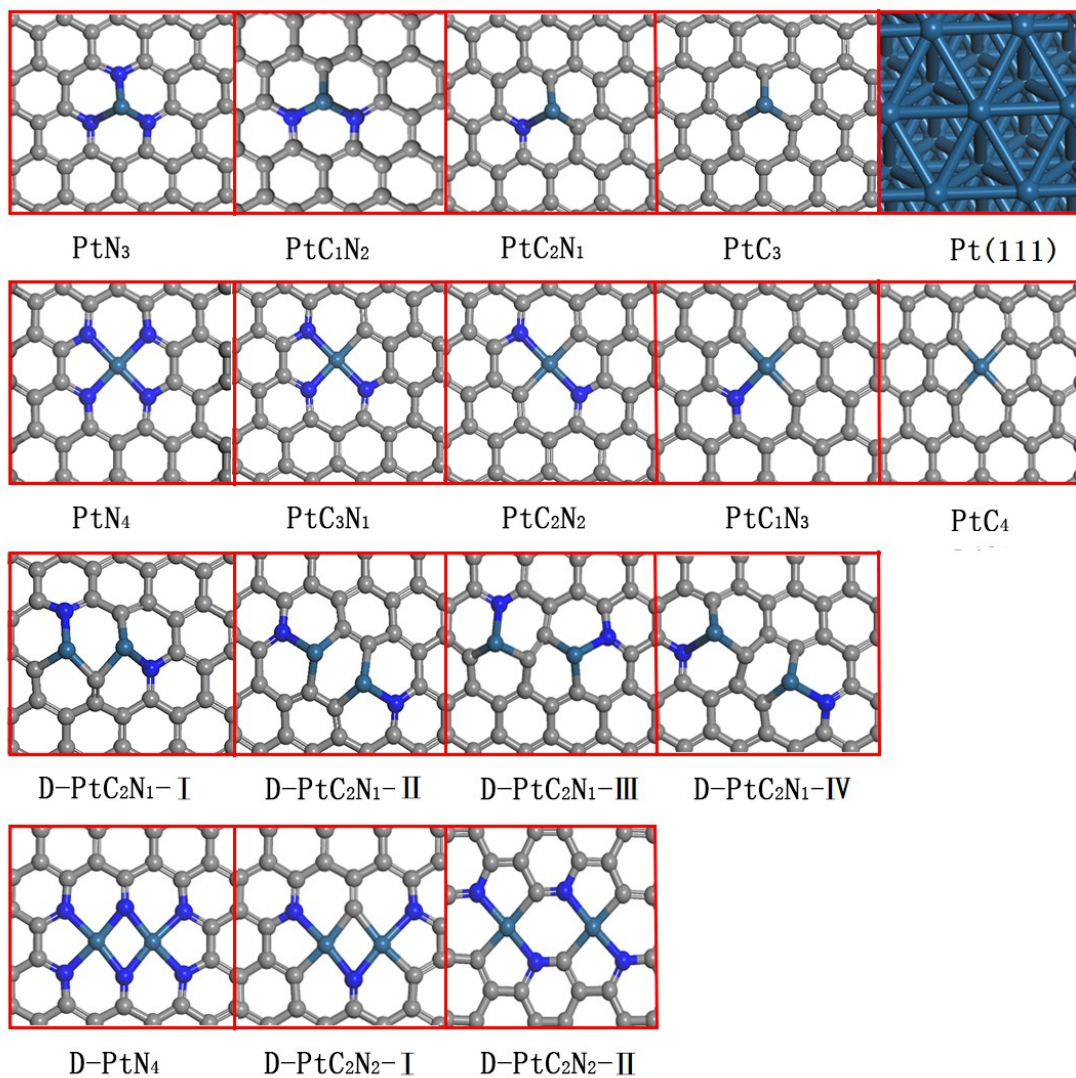

**Fig. S23** Optimized structures of Pt atoms embedded into different types of N-graphene. The gray, blue, and green spheres represent C, N, and Pt atoms, respectively.

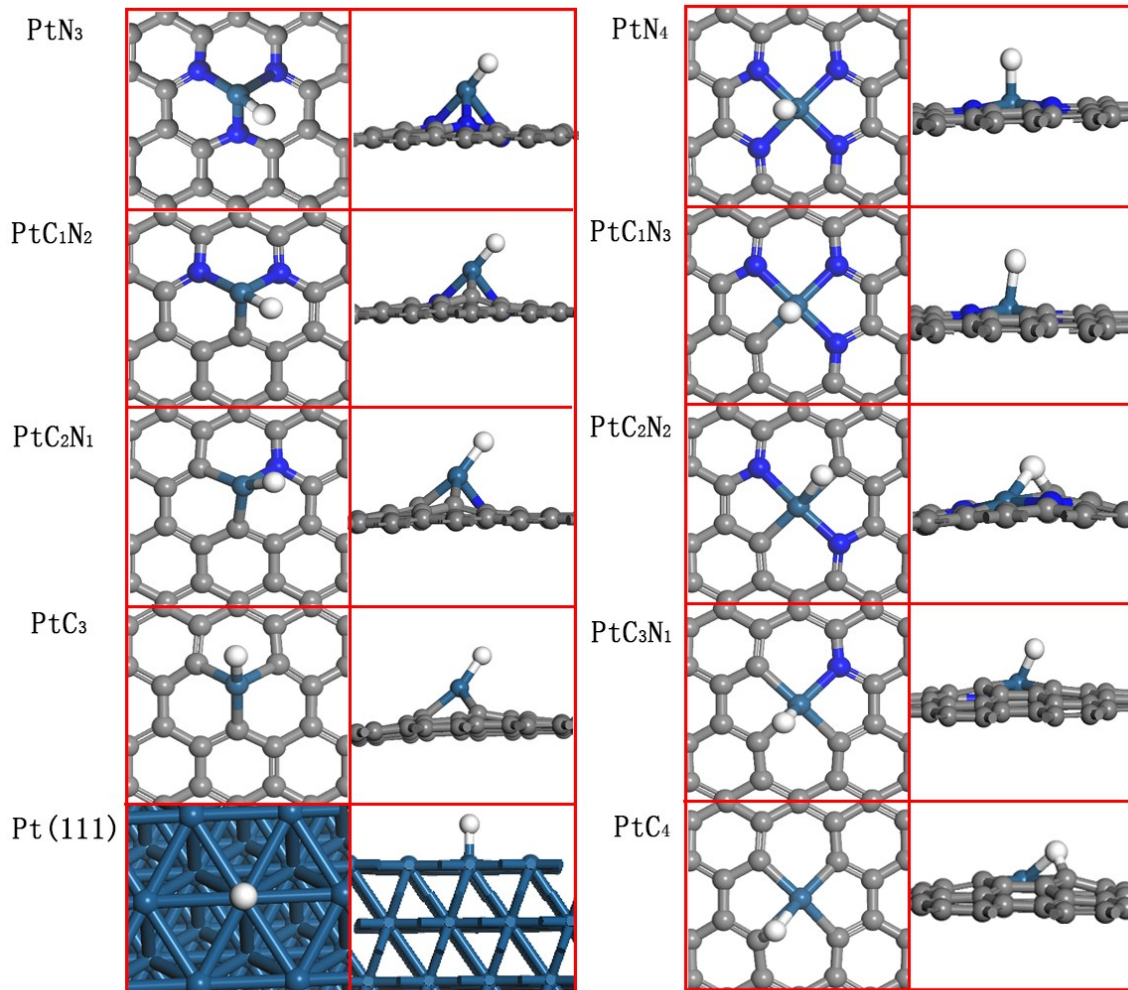

**Fig. S24** Top and side views of the stable configurations of H adsorbed on the Pt atoms of single-atomic PtC<sub>x</sub>N<sub>y</sub> moieties and Pt (111). The gray, blue, green, and white spheres represent C, N, Pt, and H atoms, respectively.

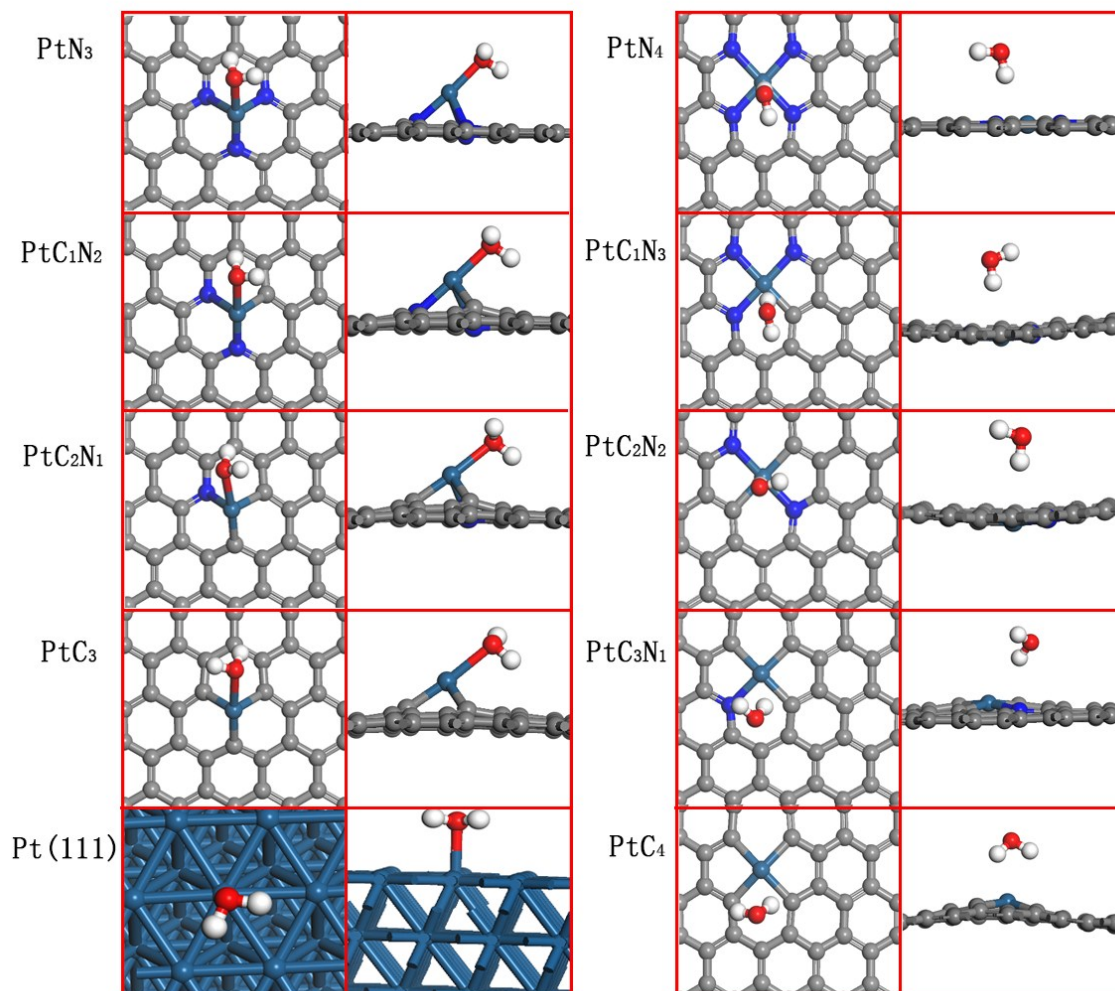

**Fig. S25** Top and side views of the stable configurations of H<sub>2</sub>O molecule adsorbed on the Pt atoms of single-atomic PtC<sub>x</sub>N<sub>y</sub> moieties and Pt (111). The gray, blue, green, red, and white spheres represent C, N, Pt, O, and H atoms, respectively.



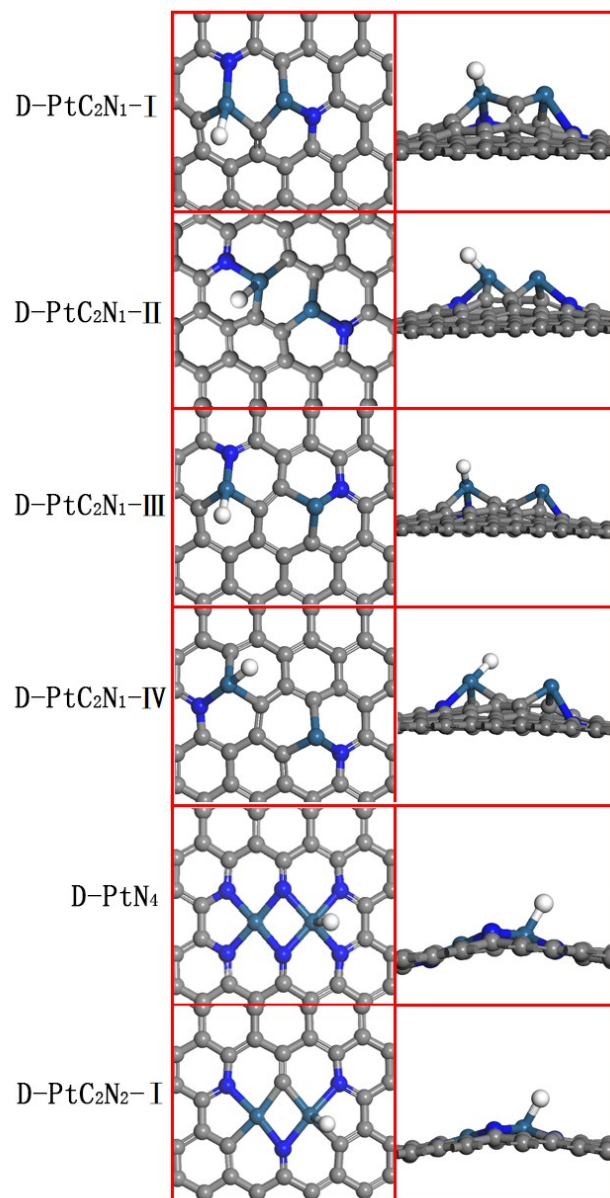

**Fig. S26** Top and side views of the stable configurations of H adsorbed on the Pt atoms of the structures containing two PtC<sub>x</sub>N<sub>y</sub> moieties. The gray, blue, green, and white spheres represent C, N, Pt, and H atoms, respectively.

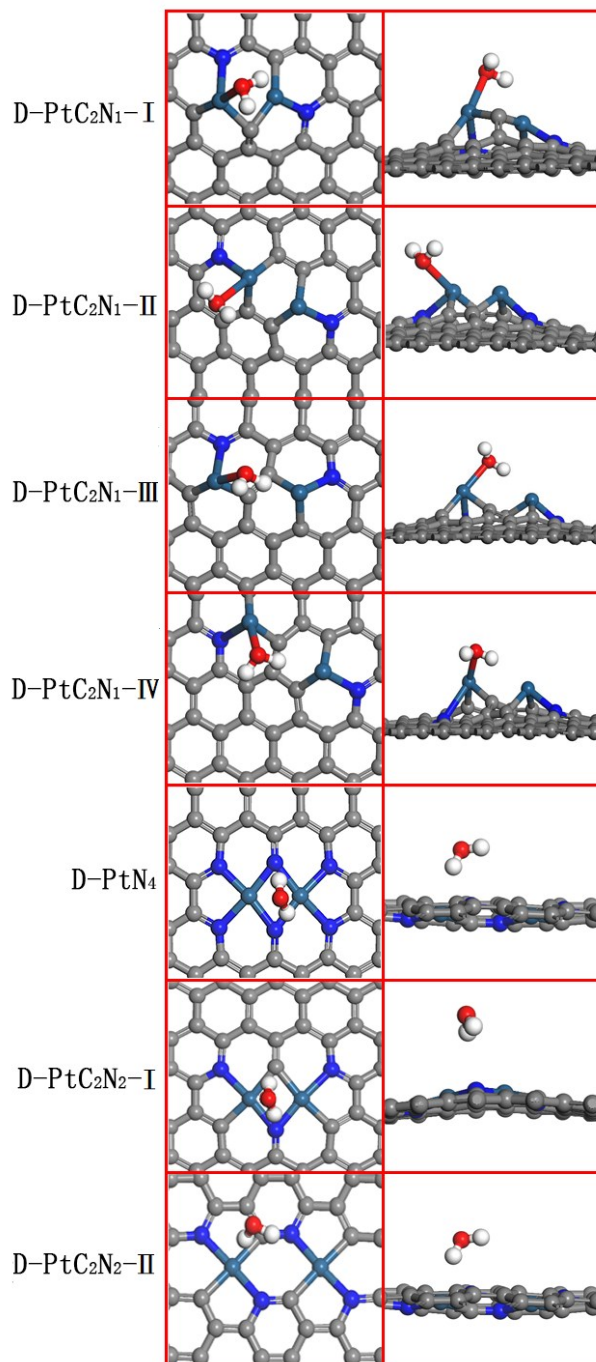

**Fig. S27** Top and side views of the stable configurations of  $\text{H}_2\text{O}$  molecule adsorbed on the Pt atoms of the structures containing two  $\text{PtC}_x\text{N}_y$  moieties. The gray, blue, green, red, and white spheres represent C, N, Pt, O, and H atoms, respectively.

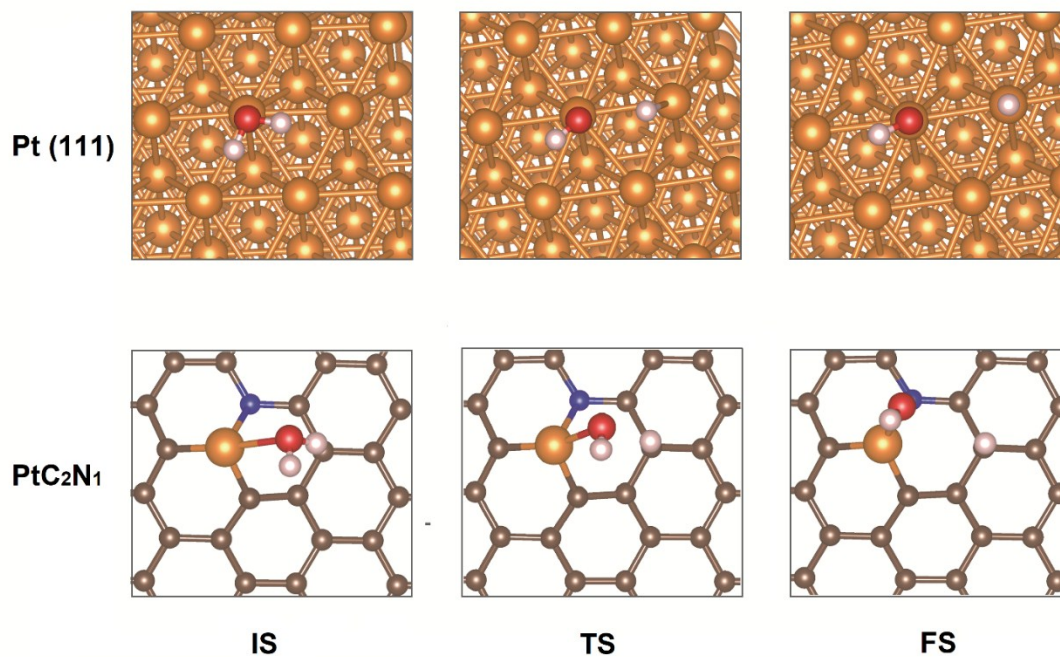

**Fig. S28** The structures of initial state (IS), the transition state (TS), and final state (FS) for Pt (111) and PtC<sub>2</sub>N<sub>1</sub>. The brown, golden, blue, red, and white spheres represent C, Pt, N, O, and H atoms, respectively

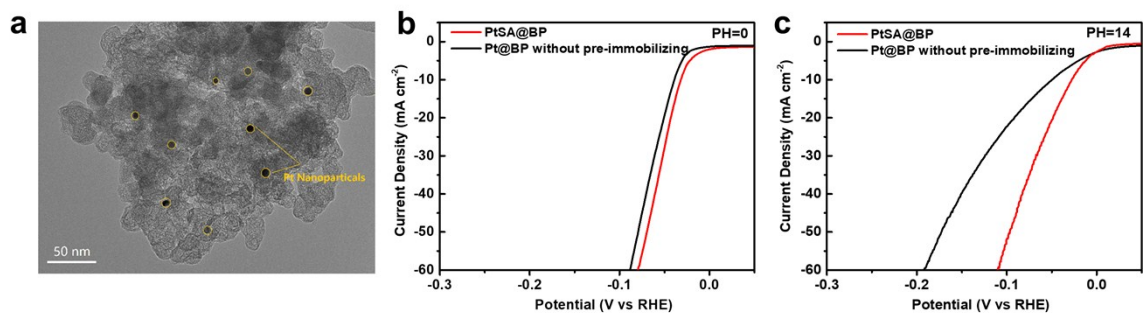

**Fig. S29** (a) TEM image of Pt@BP without pre-immobilizing. LSV curves of PtSA@BP and Pt@BP without pre-immobilizing in (b) 0.5 M H<sub>2</sub>SO<sub>4</sub> and (c) 1.0 M KOH. Pt@BP without pre-immobilizing refers to direct heating of PtTBPP/BP hybrid at 800°C for 2 h without pre-heating at 280°C.

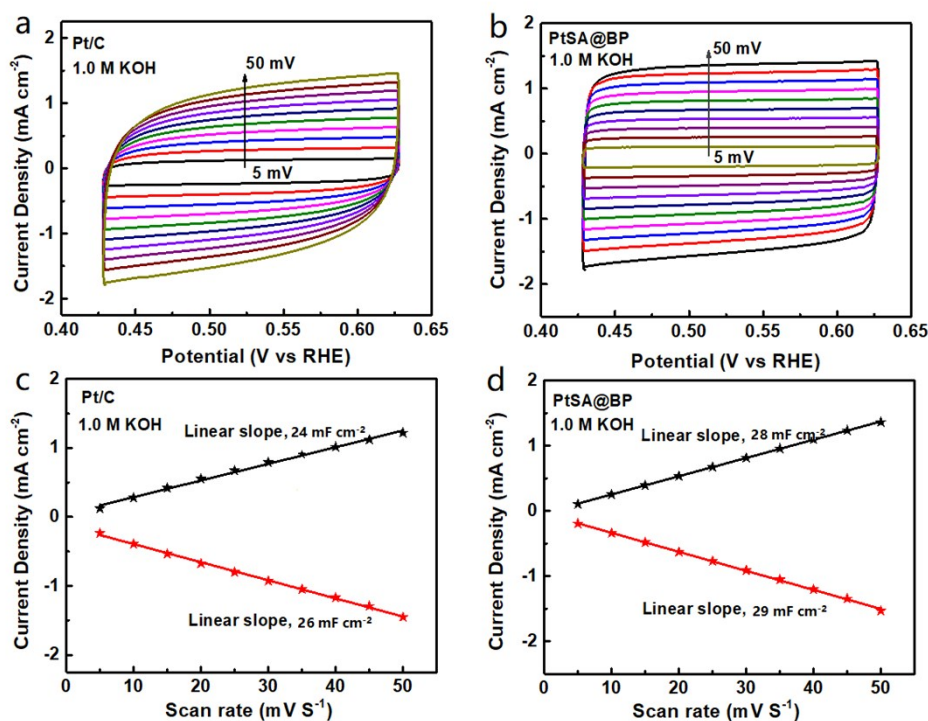

**Fig. S30** (a)(b) CV conducted at potential from 0.43 V to 0.63 V vs RHE at scan rates of 5 mV s<sup>-1</sup> to 50 mV s<sup>-1</sup> in 1.0 M KOH. (c)(d) The current densities of anode and cathode measured at 0.52 V vs RHE with different scan rates. (a)(c) and (b)(d) are Pt/C and PtSA@BP, respectively.

To study the electrochemically active surface area (ECSA) of Pt/C and PtSA@BP, we conducted the CV cycles at different scan rates during the potential from 0.43 V to 0.63 V vs RHE in 1.0 M KOH, where there is no Faradic current. At last, the ECSA was estimated from the as obtained double-layer capacitance ( $C_{dl}$ ). According to  $C_{dl}$  is constant, it can be calculated as:

$$C_{dl} = Q/U = (dQ/dt)/(dU/dt) = j/r,$$

$Q$  is the quantity of electric charge per unit area,

$U$  is the voltage,

$j$  is the current density and

$r$  is the scan rate

From Eq, the  $C_{dl}$  is the slope of  $j \sim r$ , which can be obtained by the Fig. S30c and S30d. The average  $C_{dl}$  of Pt/C and PtSA@BP are 25 mF/cm<sup>2</sup>, and 29 mF/cm<sup>2</sup>, respectively. The ECSA can be calculated as:

$$ECSA = C_{dl}/C_s$$

$C_s$  is the specific capacitance value for a flat standard with 1 cm<sup>2</sup> of real surface area. The general value for  $C_s$  is between 20  $\mu$ F/cm<sup>2</sup> and 60  $\mu$ F/cm<sup>2</sup>. Here we use 40  $\mu$ F/cm<sup>2</sup> as the average value (*Nat. Commun.* **2015**, 6, 8668). Thus the ECSA for Pt/C and PtSA@BP can be obtained as 625 cm<sup>2</sup> and 725 cm<sup>2</sup>. respectively.

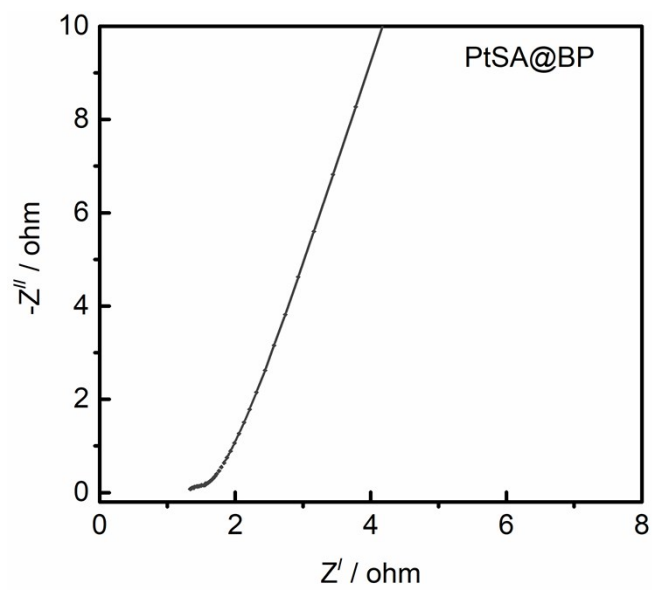

**Fig. S31.** Impedance curve of PtSA@BP.

**Table S1.** Comparison of Pt loading amount (wt %) in recent literatures.

| <b>Catalyst</b>       | <b>Pt loading amount (wt %)</b> | <b>References</b> |
|-----------------------|---------------------------------|-------------------|
| Pt@PCM                | 0.53                            | (S7)              |
| Pt <sub>1</sub> -N/BP | 0.4                             | (S8)              |
| A-CoPt-NC             | 0.16                            | (S9)              |
| PtSAs/DG              | 2.1                             | (S10)             |
| PtSA@BP               | 2.5                             | This work         |
| PtSA@BP 0.4%          | 0.4                             | This work         |
| PtSA@BP 0.7%          | 0.7                             | This work         |
| PtSA@BP 2.0%          | 2.0                             | This work         |



**Table S2.** Summary of representative HER catalysts in acidic and Alkaline electrolyte.

| Catalyst                                      | Electrolyte                          | Overpotential<br>(10mA cm <sup>-2</sup> ) | Tafel slope | References |
|-----------------------------------------------|--------------------------------------|-------------------------------------------|-------------|------------|
| Pt@PCM                                        | 1.0 M KOH                            | 139                                       | 63.7        | (S7)       |
| Ni <sub>3</sub> N/Pt                          | 1.0 M KOH                            | 50                                        | 36.5        | (S8)       |
| Pd-Pt-T                                       | 1.0 M KOH                            | 70                                        | 45          | (S9)       |
| er-WS <sub>2</sub> -Pt                        | 1.0 M KOH                            | 65                                        | 60          | (S10)      |
| Mo <sub>2</sub> C@NC@Pt                       | 1.0 M KOH                            | 47                                        | 57          | (S11)      |
| Pt <sub>75</sub> Mo <sub>25</sub> @graphene   | 1.0 M KOH                            | 97                                        | 51          | (S12)      |
| Ni(OH) <sub>2</sub> -Pt <sub>2</sub> NS/Ti    | 1.0 M KOH                            | 66.7                                      | 89          | (S13)      |
| Ru/NC                                         | 1.0 M KOH                            | 21                                        | 31          | (S14)      |
| Mo <sub>1</sub> N <sub>1</sub> C <sub>2</sub> | 0.1 M KOH                            | 132                                       | 90          | (S15)      |
| Ni <sub>SA</sub> -MoS <sub>2</sub>            | 1.0 M KOH                            | 95                                        | 75          | (S16)      |
| Co <sub>1</sub> /PCN                          | 1.0 M KOH                            | 89                                        | 52          | (S17)      |
| PtSA@BP                                       | 1.0 M KOH                            | 26                                        | 37          | This work  |
| Pt@PCM                                        | 0.5 M H <sub>2</sub> SO <sub>4</sub> | 105                                       | 65.3        | (S7)       |
| PtSAs/DG                                      | 0.5 M H <sub>2</sub> SO <sub>4</sub> | 23                                        | 25          | (S18)      |
| RuSAs@PN                                      | 0.5 M H <sub>2</sub> SO <sub>4</sub> | 24                                        | 38          | (S19)      |
| Pt <sub>1</sub> /OLC                          | 0.5 M H <sub>2</sub> SO <sub>4</sub> | 38                                        | 36          | (S20)      |
| er-WS <sub>2</sub> -Pt                        | 0.5 M H <sub>2</sub> SO <sub>4</sub> | 40                                        | 27          | (S10)      |
| Cu@MoS <sub>2</sub>                           | 0.5 M H <sub>2</sub> SO <sub>4</sub> | 131                                       | 51          | (S21)      |
| Co-SAC                                        | 0.5 M H <sub>2</sub> SO <sub>4</sub> | 230                                       | 99          | (S22)      |
| PtSA@BP                                       | 0.5 M H <sub>2</sub> SO <sub>4</sub> | 31                                        | 31          | This work  |

**Table S3.** Calculated Pt binding energies ( $E_b$ ), hydrogen adsorption Gibbs free energies ( $\Delta G_{H^*}$ ), and H<sub>2</sub>O adsorption energies ( $E_{ads}$ ) on the different models of Pt-embedded N-doped graphene.

| species                                | $E_b/eV$ | $\Delta G_{H^*}/eV$ | $E_{ads}/eV$ | Pt-Pt distance (Å) |
|----------------------------------------|----------|---------------------|--------------|--------------------|
| PtN <sub>4</sub>                       | -7.99    | 0.15                | -0.25        | -                  |
| PtC <sub>1</sub> N <sub>3</sub>        | -8.89    | 0.20                | -0.22        | -                  |
| PtC <sub>2</sub> N <sub>2</sub>        | -9.68    | -0.06               | -0.30        | -                  |
| PtC <sub>3</sub> N <sub>1</sub>        | -8.45    | -0.27               | -0.26        | -                  |
| PtC <sub>4</sub>                       | -7.83    | -0.36               | -0.23        | -                  |
| PtN <sub>3</sub>                       | -2.747   | -0.87               | -0.71        | -                  |
| PtC <sub>1</sub> N <sub>2</sub>        | -4.87    | -0.42               | -0.86        | -                  |
| PtC <sub>2</sub> N <sub>1</sub>        | -5.22    | -0.16               | -1.02        | -                  |
| PtC <sub>3</sub>                       | -6.64    | -0.20               | -0.53        | -                  |
| D-PtC <sub>2</sub> N <sub>1</sub> - I  | -5.7     | -0.78               | -0.79        | 2.57               |
| D-PtC <sub>2</sub> N <sub>1</sub> - II | -6.15    | -0.48               | -0.63        | 2.63               |
| D-PtC <sub>2</sub> N <sub>1</sub> -III | -5.62    | -0.17               | -1.14        | 3.82               |
| D-PtC <sub>2</sub> N <sub>1</sub> -IV  | -4.86    | -0.33               | -1.09        | 4.04               |
| D-PtN <sub>4</sub>                     | -8.12    | -0.13               | -0.18        | 2.67               |
| D-PtC <sub>2</sub> N <sub>2</sub> - I  | -9.05    | -0.13               | -0.2         | 2.41               |
| D-PtC <sub>2</sub> N <sub>2</sub> - II | -9.76    | -                   | -0.23        | 4.20               |
| Pt (111)                               | -        | -0.11               | -0.50        | -                  |

## References

- (S1) K. T. Weber, K. Karikis, M. D. Weber, P. B. Coto, A. Charisiadis, D. Charitaki, G. Charalambidis, P. Angaridis, A. G. Coutsolelos and R. D. Costa, *Dalton Trans.*, 2016, **45**, 13284-13288.
- (S2) J. P. Perdew, K. Burke and M. Ernzerhof, *Phys. Rev. Lett.*, 1996, **77**, 3865-3868.
- (S3) G. Kresse and J. Hafner, *Phys. Rev. B*, 1993, **48**, 13115-13118.
- (S4) G. Kresse and J. Furthmüller, *Phys. Rev. B*, 1996, **54**, 11169-11186.
- (S5) S. Grimme, S. Ehrlich and L. Goerigk, *J. Comput. Chem.*, 2011, **32**, 1456-1465.
- (S6) J. K. Nørskov, T. Bligaard, A. Logadottir, J. R. Kitchin, J. G. Chen, S. Pandalov and U. Stimming, *J. Electrochem. Soc.*, 2005, **152**, J23-J26.
- (S7) H. B. Zhang, P. F. An, W. Zhou, B. Y. Guan, P. Zhang, J. C. Dong and X. W. Lou, *Sci. Adv.*, 2018, **4**, 9.
- (S8) Y. Wang, L. Chen, X. Yu, Y. Wang and G. Zheng, *Adv. Energy Mater.*, 2017, **7**, 1601390.
- (S9) J. Fan, K. Qi, L. Zhang, H. Zhang, S. Yu and X. Cui, *ACS Appl. Mater. Interfaces*, 2017, **9**, 18008-18014.
- (S10) K. Tang, X. F. Wang, Q. Li and C. L. Yan, *Adv. Mater.*, 2018, **30**, 170477.
- (S11) J.-Q. Chi, J.-Y. Xie, W.-W. Zhang, B. Dong, J.-F. Qin, X.-Y. Zhang, J.-H. Lin, Y.-M. Chai and C.-G. Liu, *ACS Appl. Mater. Interfaces*, 2019, **11**, 4047-4056.
- (S12) V.-T. Nguyen, N.-A. Nguyen, Y. Ali, Q. C. Tran and H.-S. Choi, *Carbon*, 2019, **146**, 116-124.
- (S13) L. Xie, X. Ren, Q. Liu, G. Cui, R. Ge, A. M. Asiri, X. Sun, Q. Zhang and L. Chen, *J. Mater. Chem. A*, 2018, **6**, 1967-1970.

- (S14) J. Zhang, P. Liu, G. Wang, P. P. Zhang, X. D. Zhuang, M. W. Chen, I. M. Weidinger and X. L. Feng, *J. Mater. Chem. A*, 2017, **5**, 25314-25318.
- (S15) W. Chen, J. Pei, C.-T. He, J. Wan, H. Ren, Y. Zhu, Y. Wang, J. Dong, S. Tian, W.-C. Cheong, S. Lu, L. Zheng, X. Zheng, W. Yan, Z. Zhuang, C. Chen, Q. Peng, D. Wang and Y. Li, *Angew. Chem. Int. Ed.*, 2017, **129**, 16302-16306.
- (S16) R. Luo, M. Luo, Z. Wang, P. Liu, S. Song, X. Wang and M. Chen, *Nanoscale*, 2019, **11**, 7123-7128.
- (S17) L. Cao, Q. Luo, W. Liu, Y. Lin, X. Liu, Y. Cao, W. Zhang, Y. Wu, J. Yang, T. Yao and S. Wei, *Nat. Catal.*, 2019, **2**, 134-141.
- (S18) Y. Qu, B. Chen, Z. Li, X. Duan, L. Wang, Y. Lin, T. Yuan, F. Zhou, Y. Hu, Z. Yang, C. Zhao, J. Wang, C. Zhao, Y. Hu, G. Wu, Q. Zhang, Q. Xu, B. Liu, P. Gao, R. You, W. Huang, L. Zheng, L. Gu, Y. Wu and Y. Li, *J. Am. Chem. Soc.*, 2019, **141**, 4505-4509.
- (S19) J. Yang, B. Chen, X. Liu, W. Liu, Z. Li, J. Dong, W. Chen, W. Yan, T. Yao, X. Duan, Y. Wu and Y. Li, *Angew. Chem., Int. Ed.*, 2018, **57**, 9495-9500.
- (S20) D. Liu, X. Li, S. Chen, H. Yan, C. Wang, C. Wu, Y. A. Haleem, S. Duan, J. Lu, B. Ge, P. M. Ajayan, Y. Luo, J. Jiang and L. Song, *Nat. Energy*, 2019, **4**, 512-518.
- (S21) L. Ji, P. Yan, C. Zhu, C. Ma, W. Wu, C. Wei, Y. Shen, S. Chu, J. Wang, Y. Du, J. Chen, X. Yang and Q. Xu, *Appl. Catal. B*, 2019, **251**, 87-93.
- (S22) M. D. Hossain, Z. Liu, M. Zhuang, X. Yan, G.-L. Xu, C. A. Gadre, A. Tyagi, I. H. Abidi, C.-J. Sun, H. Wong, A. Guda, Y. Hao, X. Pan, K. Amine and Z. Luo, *Adv. Energy Mater.*, 2019, **9**, 1803689.
